# Supplementary material for: A large-scale genome-wide cross-trait analysis reveals shared genetic architecture between Alzheimer’s disease and gastrointestinal tract disorders
Source: PubMed Central journal article supplement (PMC9293965; doi:10.1038/s42003-022-03607-2), 2022-07-18
Supplement: 42003_2022_3607_MOESM2_ESM.pdf [file 42003_2022_3607_MOESM2_ESM.pdf]

## Description of Additional Supplementary Files

**File name:** Supplementary Data 1

**Description:** Detailed description of GWAS datasets analysed in this study

**File name:** Supplementary Data 2

**Description:** Results showing no significant sample overlap between AD and GIT traits (based on genetic covariance intercept estimates).

**File name:** Supplementary Data 3

**Description:** Replication of genetic correlation between AD and GIT disorders.

**File name:** Supplementary Data 4

**Description:** Test for concordant SNP effects between AD (with APOE region) and GIT traits.

**File name:** Supplementary Data 5

**Description:** Replication analysis of the primary test for concordant SNP effects between AD (dataset 1) and GIT disorders (dataset 2).

**File name:** Supplementary Data 6

**Description:** Replication analysis of the primary test for concordant SNP effects between AD (dataset 2) and GIT disorders (dataset 1).

**File name:** Supplementary Data 7

**Description:** Summary of cross-traits LDSC correlation analysis between PGM and other GIT traits.

**File name:** Supplementary Data 8

**Description:** SNPs reaching genome-wide significance in the meta-analysis of AD and GERD GWAS.

**File name:** Supplementary Data 9

**Description:** Independent SNPs and loci reaching genome-wide suggestive association in the GWAS meta-analysis of AD and GERD.

**File name:** Supplementary Data 10

**Description:** Sentinel SNPs for AD associated with GIT disorders and vice versa.

**File name:** Supplementary Data 11

**Description:** SNPs and loci reaching genomewide significance in the meta-analysis of AD and PUD GWAS.

**File name:** Supplementary Data 12

**Description:** SNPs and loci replicated in the meta-analysis of AD and PUD GWAS.

**File name:** Supplementary Data 13

**Description:** Independent SNPs and loci reaching suggestive association in the metaanalysis of AD and PUD GWAS.

**File name:** Supplementary Data 14

**Description:** SNPs reaching genome-wide significance in the Meta-analysis of AD and PGM GWAS.

**File name:** Supplementary Data 15

**Description:** SNPs reaching genome-wide suggestive association for AD and PGM in the GWAS meta-analysis.

**File name:** Supplementary Data 16

**Description:** Other traits associated with 6p21.32 (near HLA-DRA).

**File name:** Supplementary Data 17

**Description:** Other traits associated with 17q21.32 (near ZNF652 and PHB).

**File name:** Supplementary Data 18

**Description:** Genomic regions shared by AD with PGM and GERD GWAS.

**File name:** Supplementary Data 19

**Description:** MR analysis results of the association between AD and GIT disorders.

**File name:** Supplementary Data 20

**Description:** Genome-wide significant genes for Alzheimer's disease.

**File name:** Supplementary Data 21

**Description:** Genome-wide significant genes for GERD GWAS.

**File name:** Supplementary Data 22

**Description:** Genome-wide significant genes for PGM.

**File name:** Supplementary Data 23

**Description:** AD and GERD shared genes reaching genome-wide significance in the FCP analysis.

**File name:** Supplementary Data 24

**Description:** Comparing Fisher's with Weighted Stouffer's method in combining pvalues for AD and GERD shared genes.

**File name:** Supplementary Data 25

**Description:** AD and PGM shared genes reaching genome-wide significance in the FCP analysis.

**File name:** Supplementary Data 26

**Description:** Significantly enriched pathways for Alzheimer's disease and gastroesophageal reflux disease.

**File name:** Supplementary Data 27

**Description:** Significantly enriched pathways for Alzheimer's disease and medicines for peptic ulcer or gastroesophageal reflux disease (PGM).

**File name:** Supplementary Data 28

**Description:** Significantly enriched pathways for GERD.

**File name:** Supplementary Data 29

**Description:** Significantly enriched pathways for AD.
